# Supplementary material for: Transcriptional Network Architecture of Breast Cancer Molecular Subtypes
Source: PubMed Central journal article supplement (PMC5118907; doi:10.3389/fphys.2016.00568), 2016-11-22
Supplement: DataSheet6.pdf [file DataSheet6.pdf]

Table 1: Network metrics of the null model. The network construction was performed by reconnecting nodes according to the Erdős-Renyi model

| Parameter              | Luminal A | Luminal B | Basal  | HER2-enriched | Non-tumor |
|------------------------|-----------|-----------|--------|---------------|-----------|
| Nodes                  | 1,451     | 1,018     | 1,046  | 2,100         | 1,027     |
| Edges                  | 10,013    | 9,880     | 9,972  | 9,827         | 9,966     |
| Connected components   | 1         | 1         | 1      | 2             | 1         |
| Clustering Coefficient | 0.0100    | 0.0190    | 0.0184 | 0.0041        | 0.0189    |

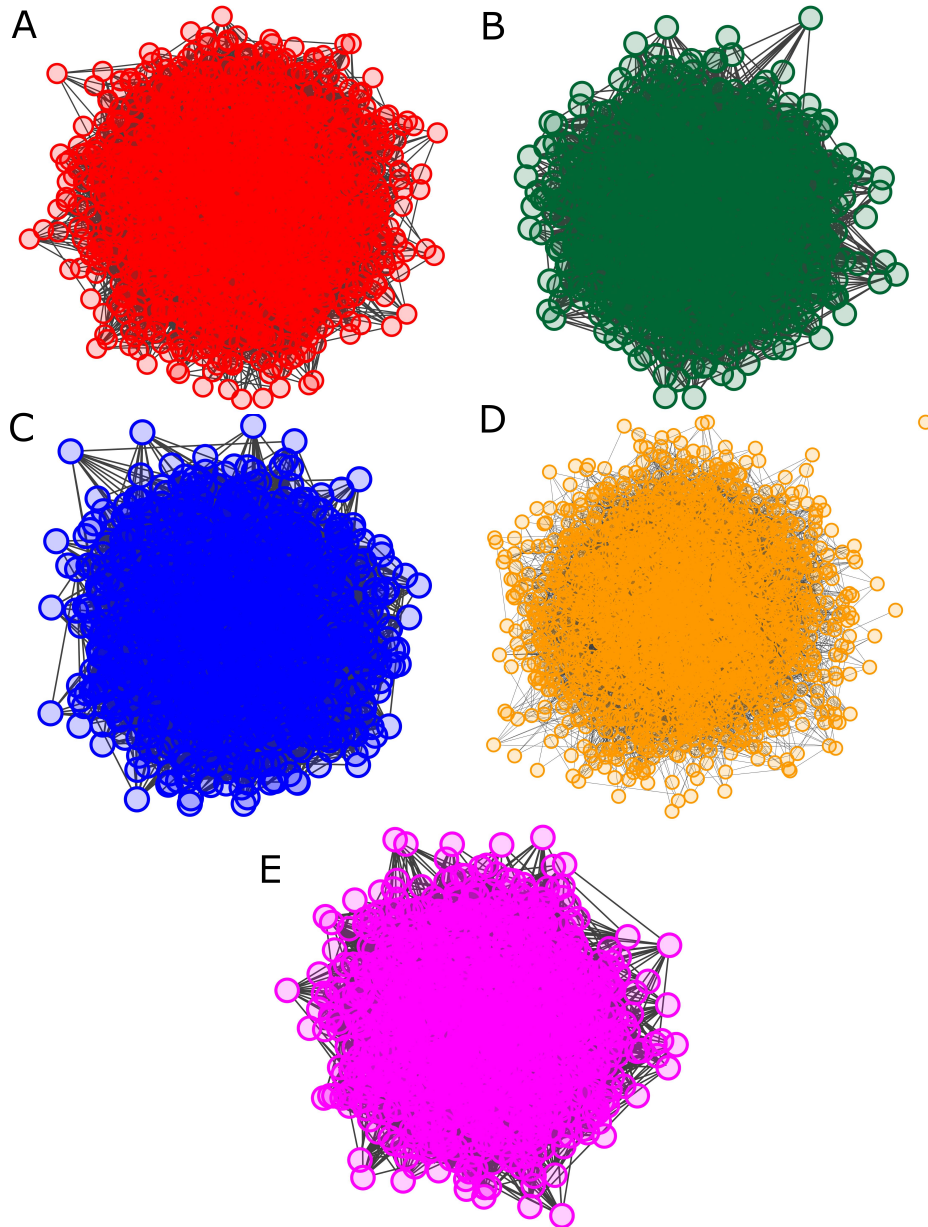

Figure 1. Visualization of the null model networks. The network construction was performed by reconnecting nodes of each phenotype network (luminal A, luminal B, basal, HER2-enriched, and non-tumor) according to the Erdős-Renyi model.
